# Supplementary material
Source: HighWire-hosted journal article supplement (http://www.jrheum.org/highwire/filestream/29696/field_highwire_adjunct_files/0/140989DataSupplCxn.pdf)
Supplement: 140989DataSupplCxn.pdf [file 140989DataSupplCxn.pdf]

**Communication Vulnerabilities in Working-age Australians with  
Musculoskeletal Conditions: A Cross-sectional Analysis**

Lowe DB, Taylor MJ, Hill SJ. Communication vulnerabilities in working-age Australians with musculoskeletal conditions: a cross-sectional analysis. J Rheumatol published online before print May 1, 2015, doi:10.3899/jrheum.140989. In the First Release version of this article, the Objective section of the Abstract should read as follows:

**Objective.** To estimate the prevalence of communication vulnerability (CV) and its association with various health measures among working-age Australians with musculoskeletal conditions (MSK). The various vulnerability characteristics may lead to inadequate communication between consumers and healthcare professionals.

We regret the error.

doi:10.3899/jrheum.140989.C1
